# Supplementary material for: Electrohydrodynamic 3D printing of layer-specifically oriented, multiscale conductive scaffolds for cardiac tissue engineering
Source: Royal Society of Chemistry journal article supplement (doi:10.1039/c9nr04989d), 2019-01-01
Supplement: c9nr04989d1.pdf [file c9nr04989d1.pdf]

## Electronic Supplementary information (ESI)

### Electrohydrodynamic 3D Printing of Layer-specifically Oriented, Multiscale Conductive Scaffolds for Cardiac Tissue Engineering

Qi Lei,<sup>1,2</sup> Jiangkang He\*<sup>1,2</sup> and Dichen Li<sup>1,2</sup>

1 State key laboratory for manufacturing systems engineering, Xi'an Jiaotong University, Xi'an 710049, China

2 Rapid manufacturing research center of Shaanxi Province, Xi'an Jiaotong University, Xi'an, 710049, China

E-mail: jiankanghe@mail.xjtu.edu.cn

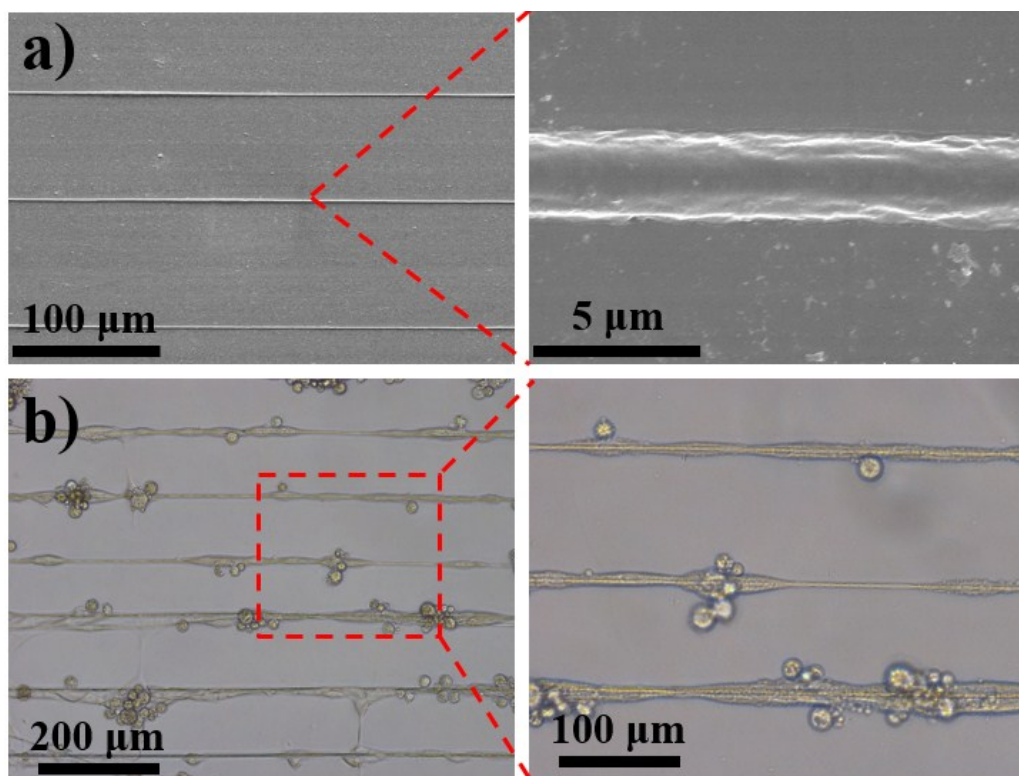

**Fig. S1** The EHD-printed PCL fibers with a diameter of about 2.5 μm a) and their effect on the attachment of H9C2 cells b).

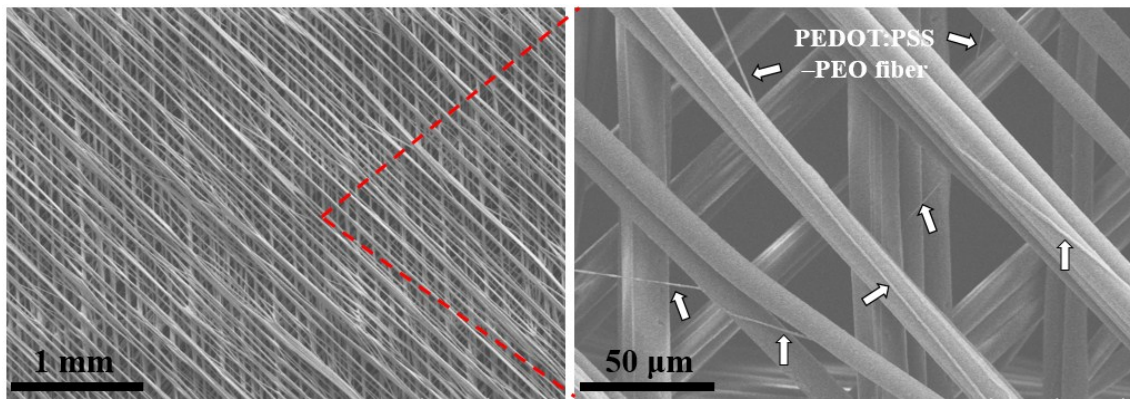

**Fig. S2** Stability of the EHD-printed multiscale conductive scaffolds when immersed in water for 5 days.

### Supplementary Movie Captions

Movie S1. Primary cardiomyocytes cultured on microfibrinous PCL scaffold for 4 days.

Movie S2. Primary cardiomyocytes cultured on multiscale conductive scaffold for 4 days.

Movie S3. Primary cardiomyocytes cultured on microfibrinous PCL scaffold for 8 days.

Movie S4. Primary cardiomyocytes cultured on multiscale conductive scaffold for 8 days.
